# Supplementary material for: An insight into tetrahydro-β-carboline–tetrazole hybrids: synthesis and bioevaluation as potent antileishmanial agents
Source: Royal Society of Chemistry journal article supplement (doi:10.1039/c7md00125h), 2017-01-01
Supplement: c7md00125h1.pdf [file c7md00125h1.pdf]

## **Supporting Information**

### **An Insight into Tetrahydro- $\beta$ -carboline-Tetrazole Hybrids: Synthesis and Bioevaluation as Potent Antileishmanial Agents**

Pooja Purohit,<sup>a</sup> Anand Kumar Pandey,<sup>a</sup> Deepti Singh Chauhan,<sup>a</sup> Pradeep Singh Chouhan,<sup>a</sup> Karthik Ramalingam,<sup>b</sup> Mahendra Shukla,<sup>c</sup> Neena Goyal,<sup>b</sup> Jawahar Lal,<sup>c</sup> Prem M. S. Chauhan<sup>a\*</sup>

<sup>a</sup>Medicinal and Process Chemistry Division, CSIR-Central Drug Research Institute, Lucknow-226031, U.P., India.

<sup>b</sup>Division of Biochemistry, CSIR-Central Drug Research Institute, Lucknow-226031, U.P., India.

<sup>c</sup>Pharmacokinetics & Metabolism Division, CSIR-Central Drug Research Institute, Lucknow, India.

\*Corresponding author mailing address: Medicinal and Process Chemistry Division, CSIR-Central Drug Research Institute, Sector 10, Jankipuram Extension, Sitapur Road, Lucknow-226031, U.P, India, Phone: +91 522 2771940, 2771942; Fax: +91 522 2771941. Email: prem\_chauhan\_2000@yahoo.com; prem58@hotmail.com

#### **Table of content**

|                                                   |          |
|---------------------------------------------------|----------|
| Experimental section for Antileishmanial activity | S2 – S4  |
| Experimental section for Pharmacokinetics study   | S5 – S6  |
| References                                        | S6       |
| Spectra of compounds                              | S7 – S27 |

**Experimental section for antileishmanial activity:** Each compound was evaluated for its *in vitro* activity against WHO reference strain (MHOM/IN/80/Dd8) of extracellular promastigotes and intramacrophagic amastigotes (expressing luciferase firefly reporter gene) of *L. donovani*. The *in vitro* cytotoxicity assay was performed using murine macrophage J-774A.1 cell line.

***In vitro* antileishmanial assay:** *Leishmania donovani* promastigotes (WHO designation MHOM/IN/80/Dd8), originally obtained as a gift from (late) Prof. P. C. C. Garnham and routinely maintained at the institute in golden hamsters, were used in the present study. Promastigotes were grown in medium 199 medium (Sigma) supplemented with 10 % heat-inactivated fetal calf serum (GBL) and 1% penicillin (50 U/ml) and streptomycin (50 mg/ml) solution (Sigma) at 24 °C.<sup>1</sup> Luciferase tagged with promastigotes maintained at 25 ± 1 °C in medium 199 (Sigma Chemical) supplemented with 10 % Fetal Calf Serum (Gibco, Gaithersburg, MD, USA) and G418 (20 µg/ml) were used for *in vitro* evaluation of antileishmanial activity.<sup>2</sup>

**Antipromastigote activity:** The *in vitro* effect of test compounds on the growth of promastigotes was assessed by monitoring the luciferase activity of viable cells after treatment.<sup>3</sup> The transgenic promastigotes of late log phase were seeded at 5 X10<sup>5</sup> cells/well in 96- well flat-bottomed microtitre (MT) plates (CELLSTAR Greiner Bio-one GmbH, Monroe, NC, USA) and incubated for 72 h in medium, in absence (control) or the presence of test compounds (stock prepared in 100 % DMSO, initial concentration, followed by serial dilution in media). The test compounds were added at 2-fold dilutions in up to 7 points in fresh complete medium starting from a 100 µM concentration. After incubation, an aliquot (50 µL) of promastigote suspension was aspirated from each well of a 96-well plate and mixed with an equal volume of Steady Glo (R) reagent (Promega, Madison, WI, USA) and luminescence was measured in luminometer.

**Antiamastigote activity:** For assessing the activity of compounds against amastigote stage of the parasite, mouse macrophage cell line (J-774A.1), infected with promastigotes expressing firefly luciferase reporter gene was used. Macrophage cells were seeded in a 96-well plate ( $5 \times 10^4$  cells / 200  $\mu$ l / well) in RPMI-1640 containing 10 % fetal calf serum. The plates were incubated at 37 °C in a CO<sub>2</sub> incubator. After 24 h, the medium was replaced with fresh medium containing stationary phase transgenic promastigotes ( $2.5 \times 10^5$  / 200  $\mu$ L / well). Promastigotes invade the macrophage and are transformed into amastigotes. The test compounds were added at 2-fold dilutions in up to 7 points in fresh complete medium starting from a 100  $\mu$ M concentration, and the plates were incubated at 37 °C in a CO<sub>2</sub> incubator for 72 h. After incubation, the drug containing medium was decanted and 50  $\mu$ l phosphate-buffered saline (PBS) was added in each well and mixed with an equal volume of Steady-Glo luciferase assay substrate dissolved in Steady-Glo luciferase assay buffer. After gentle shaking for 1 to 2 min, the readings were recorded in a luminometer. The values were expressed as relative luminescence

The IC<sub>50</sub> value of each compound was calculated by non-linear regression analysis of the concentration–response curve using the four-parameter Hill equations.

**Cytotoxicity assay:** The macrophage cell viability was determined using the MTT assay.<sup>4</sup> Exponentially growing cells (J774) ( $1-2 \times 10^5$  cells/100  $\mu$ l/well) were incubated with test compounds. The test compounds are added at three fold dilutions up to 7 points in complete medium starting from 500  $\mu$ M concentrations, and were incubated at 37 °C in a humidified mixture of CO<sub>2</sub> and 95 % air in an incubator. Control wells containing dimethyl sulfoxide (DMSO) without compounds were also included in the experiment. After incubation, 25  $\mu$ L of MTT reagent (5 mg/mL) in PBS medium and incubated at 37 °C for 2 h. At the end of the incubation period, the supernatant were removed by inverting the plate completely without

disturbing cell layer and 150  $\mu$ L of pure DMSO was added to each well. After 15 min. of shaking the readings were recorded as absorbance at 544 nm on a micro plate reader. The cytotoxic effect were expressed as 50 % lethal dose (i.e., as the concentration of a compound which provoked a 50 % reduction in cell viability compared to cell in culture medium alone).  $CC_{50}$  values were estimated as described by Huber *et al.*<sup>5</sup> The selectivity index (SI) for each compound was calculated as the ratio between, cytotoxicity ( $CC_{50}$ ) and activity ( $IC_{50}$ ) against *Leishmania* amastigotes. Compounds with SI index > 5 were considered as safe in this cytotoxic assay.

***In vivo* antileishmanial activity in hamster model:** The modified method was used for *in vivo* screening. Golden male hamsters (Inbred strain) weighing 40-45 gm were infected intra-cardially with  $1 \times 10^7$  amastigotes per animal. Pre-treatment spleen biopsy of all the animals was carried out to assess the degree of infection on day 20<sup>th</sup> of infection. The animals with +1 infection (5-15 amastigotes/100 spleen cell nuclei) were included in the experiment. The infected animals were randomized into several groups of six animals each. Drug treatment by intraperitoneal route was initiated after 2 days of biopsy and continued for 5 consecutive days. Negative control group hamsters were administered 0.2 ml of saline solution. Post-treatment biopsies were done on day 7<sup>th</sup> and 28<sup>th</sup> day of the last drug administration and amastigote counts were assessed after Giemsa staining. Intensity of infection in both, treated and untreated animals, and also the initial count in treated animals was compared and the efficacy was expressed in terms of percent inhibition (PI) using the following formula:

$$PI = 100 - [ANAT \times 100 / (INAT \times TIUC)]$$

Where PI is percent inhibition of amastigotes multiplication, ANAT is actual number of amastigotes in treated animals, INAT is initial number of amastigotes in treated animals and TIUC is times increase of parasites in untreated control animals.

### **Experimental Section for Pharmacokinetics:**

**Material and methods:** The pharmacokinetics of **14t** was studied in golden Syrian hamsters weighing  $100 \pm 10$  gm. The hamsters were obtained from Laboratory Animal Division of the Institute and were housed in plastic cages under standard laboratory conditions with a regular 12 h day-night cycle. Suspension formulation containing 12.5 mg/ml of compound was prepared by triturating **14t**, gum acacia (1%, w/v) and water (drop wise addition) in a mortar and pestle. A single 50 mg/kg oral dose was given to conscious hamsters using feeding needle and blood samples were withdrawn at various predefined times up to 24 h post dose. Serum samples were harvested from blood. All samples were stored at  $-80^{\circ}\text{C}$  until analysis. The serum (50  $\mu\text{L}$ ; blank, spiked or test) was extracted twice with 1 ml of extraction solvent (*n*-hexane: ethyl acetate, 60:40, % v/v) followed by vortex-mixing and centrifugation. The supernatant was evaporated to dryness in Turbovap LX (Caliper, Massachusetts, USA). The residue was reconstituted in 100  $\mu\text{L}$  mobile phase and centrifuged. Clear supernatant (80  $\mu\text{L}$ ) was transferred into HPLC vials and 50  $\mu\text{L}$  was injected on to the LC-MS/MS system.

A Shimadzu UFLC pump (LC-20AD) with online degasser (DGU-20A3), an auto-sampler (SIL-HTc) with a temperature-controlled peltier-tray and a API 4000 Q trap mass spectrometer (Applied Biosystems, Toronto, Canada) was used for analysis on a Discovery HS C-18 column (5  $\mu\text{m}$ , 50 x 4.6 mm id) preceded with a guard column (5  $\mu\text{m}$ , 20 x 4.0 mm, id) packed with the same material under isocratic condition at a flow rate of 0.7 mL/min. The mobile phase [85 % acetonitrile in aqueous ammonium acetate buffer (0.01 M)] was degassed by ultrasonication for

15 min before use. LC-MS/MS system was equilibrated for approximately 20 min before commencement of analysis. The column oven temperature was 40 °C. Total analysis time was 4 min per sample. Multiple reactions monitoring (MRM) was used to monitor the transitions  $m/z$ 503.2 → 331.1 for **14t** and  $m/z$ 180.1 → 138.1 for phenacetin (Internal Standard) at 5500 V spray voltage. Data acquisition and quantitation were performed using analyst software (version 1.4.2; AB Sciex, Toronto, Canada). The method was linear over the concentration range of 1-200 ng/mL with recovery of >70 % and acceptable accuracy and precision.

#### References:

1. A. Debrabant, M. Gottlieb, D. M. Dwyer, *Mol Biochem Parasitol.*, 1995, **71**, 51-63.
2. Ashutosh, S. Gupta, Ramesh, S. Sundar, N. Goyal, *Antimicrob. Agents Chemother.*, 2005, **49**, 3776-3783.
3. T. Mosmann, *J. Immunol. Methods.*, 1983, **65**, 55-63.
4. W. Huber, J. C. Koella, *Acta Trop.*, 1993, **55**, 257-261.
5. S. Bhatnagar, P. Y. Guru, J. C. Katiyar, R. Srivastava, A. Mukherjee, M. S. Akhtar, M. Seth, A. P. Bhaduri, *Indian J Med Res.*, 1989, **89**, 439-44.

## Supplementary Spectra of compounds:

### $^1\text{H}$ and $^{13}\text{C}$ NMR spectra of 14a

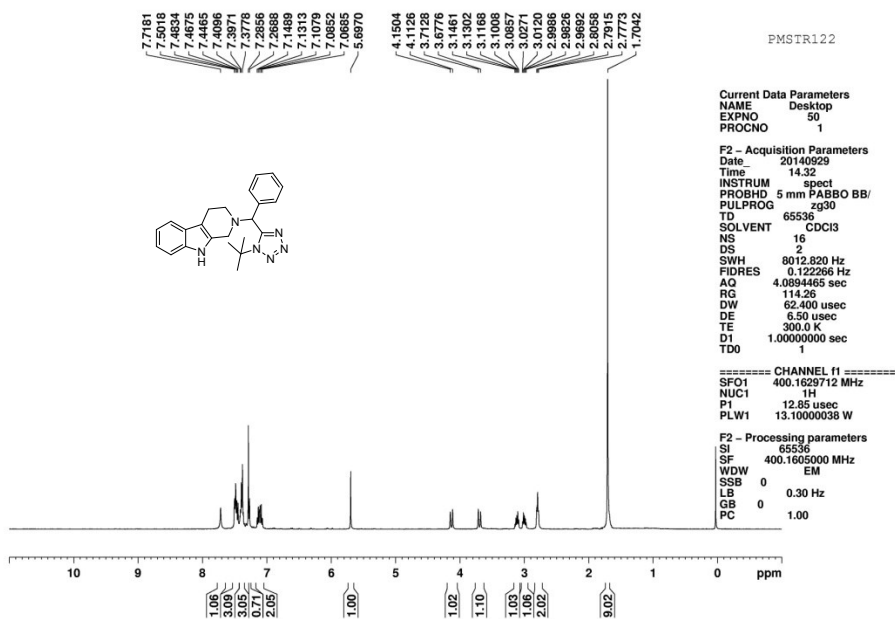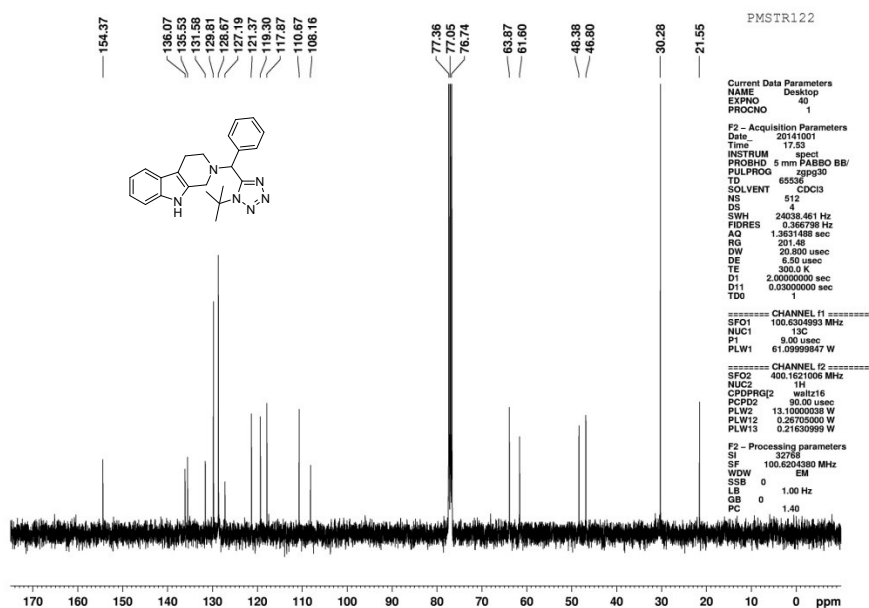

### <sup>1</sup>H and <sup>13</sup>C NMR spectra of 14b

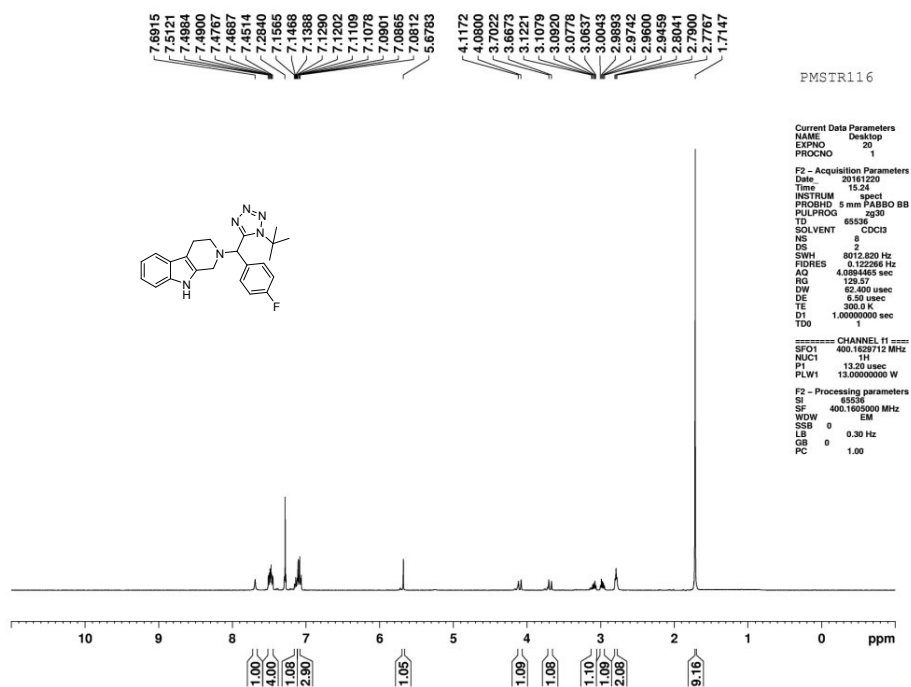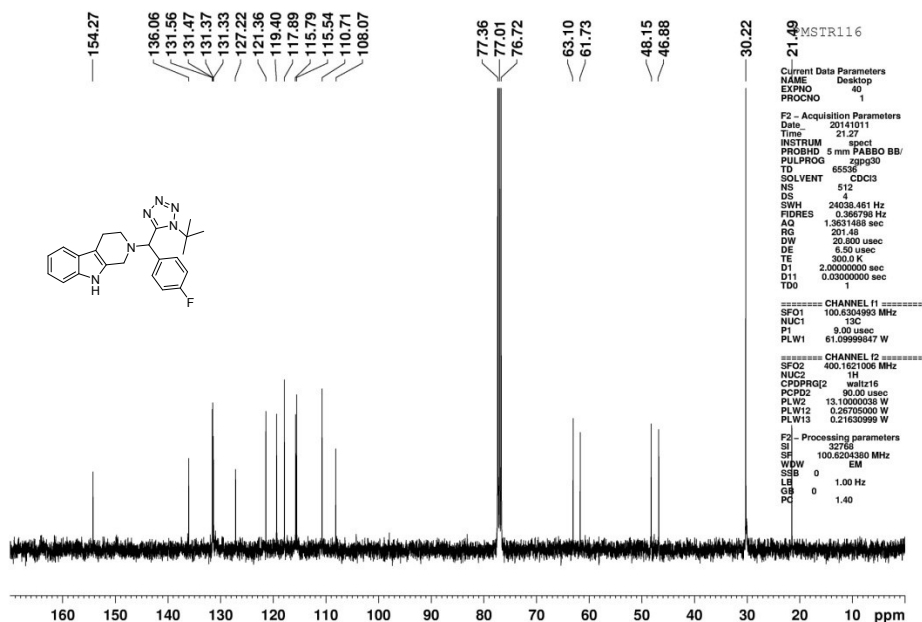

# <sup>1</sup>H and <sup>13</sup>C NMR spectra of 14c

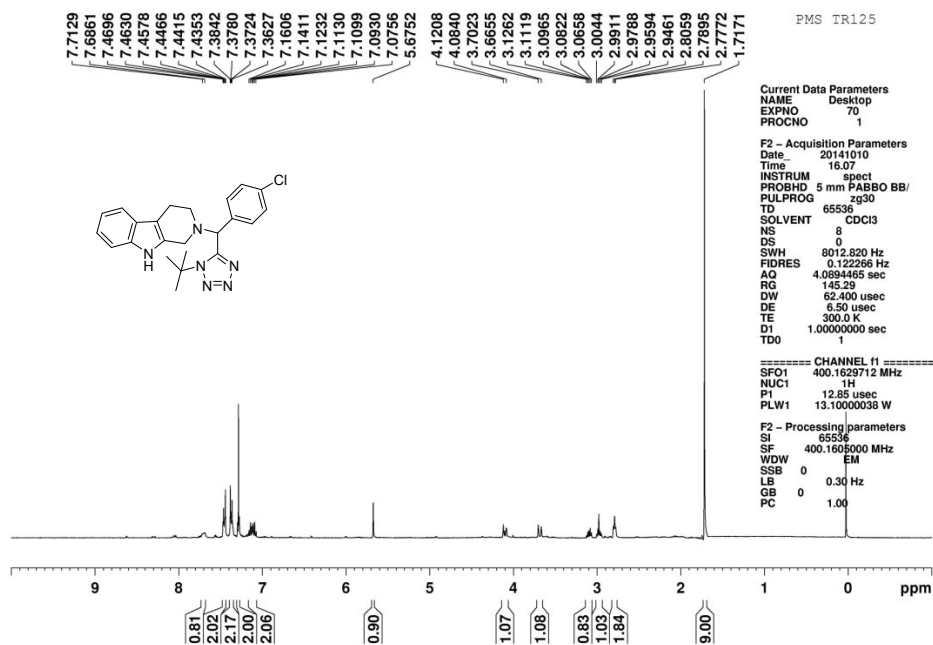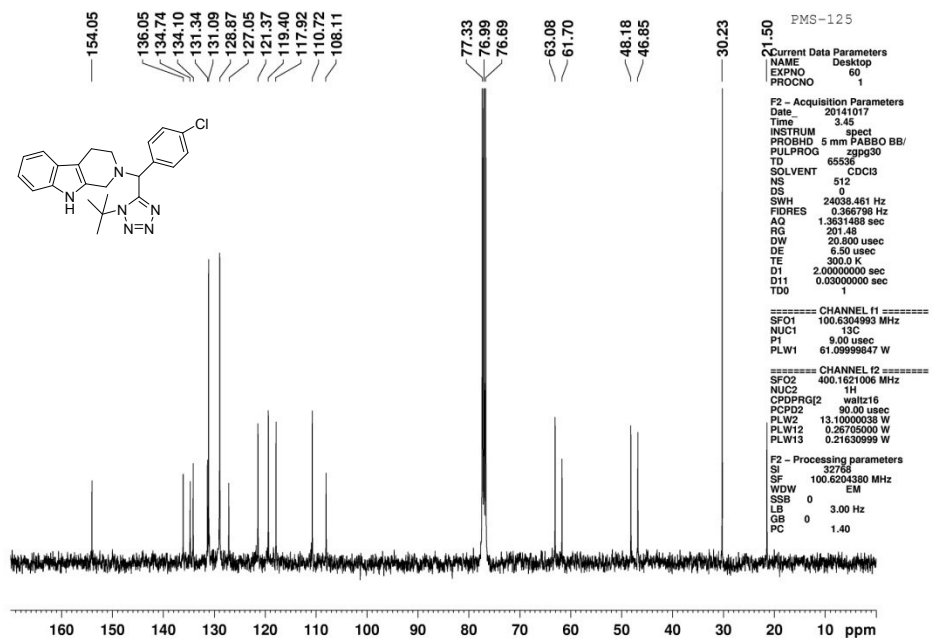

### <sup>1</sup>H and <sup>13</sup>C NMR spectra of 14d

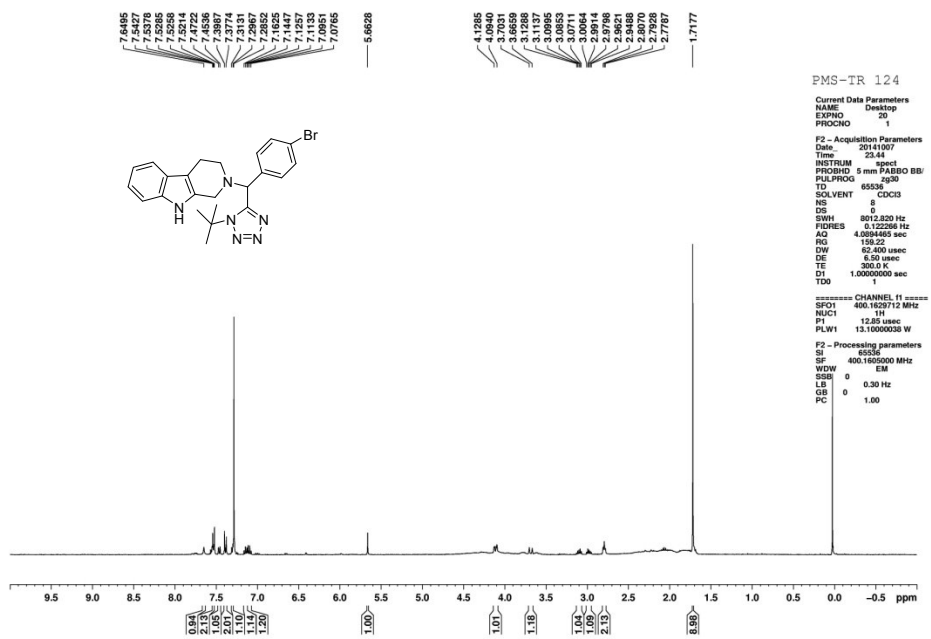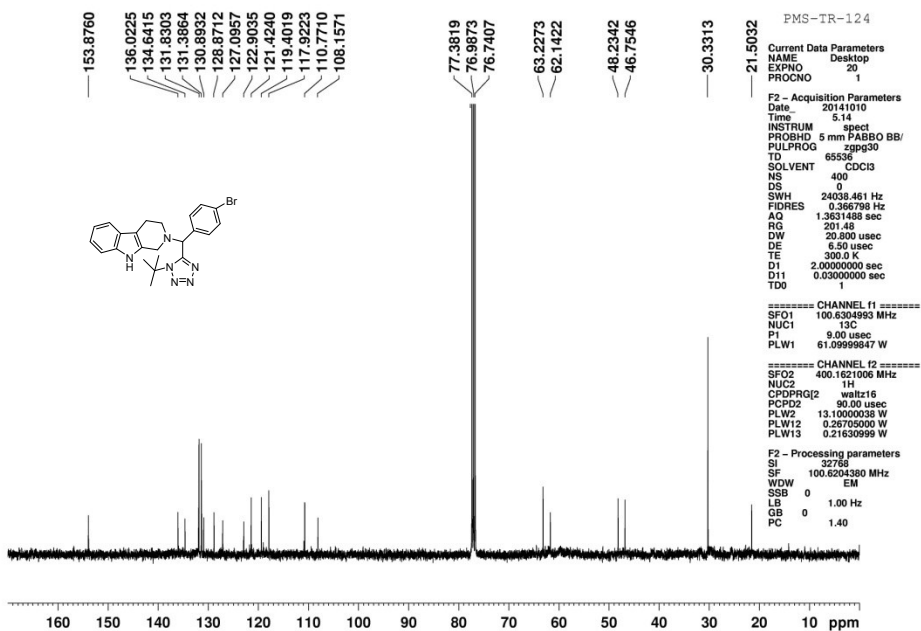

# <sup>1</sup>H and <sup>13</sup>C NMR spectra of 14e

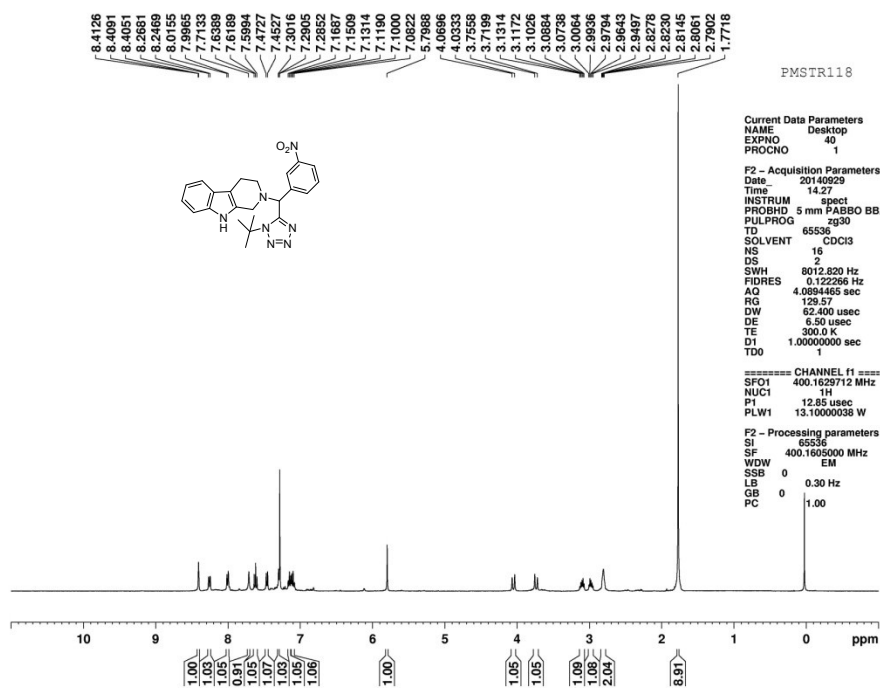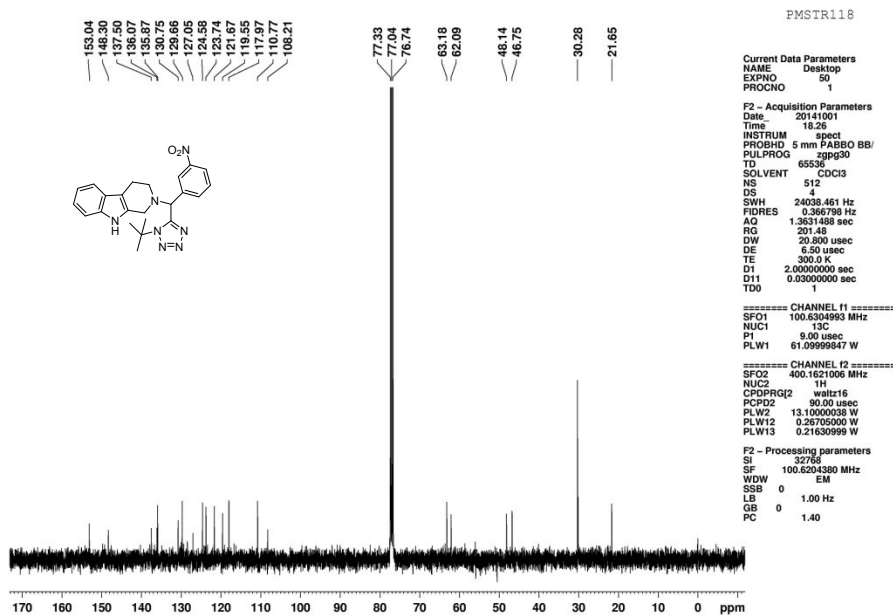

# <sup>1</sup>H and <sup>13</sup>C NMR spectra of 14f

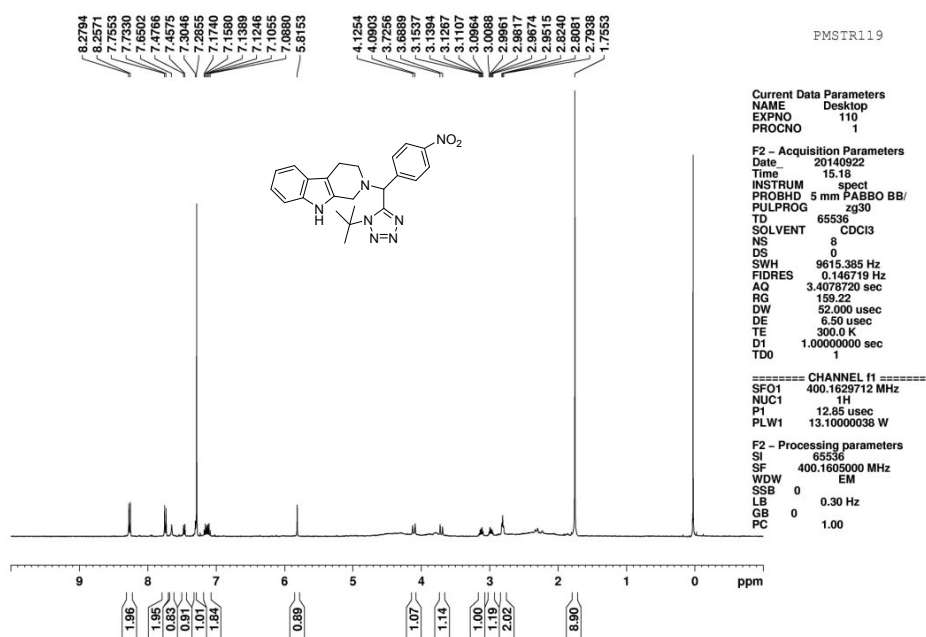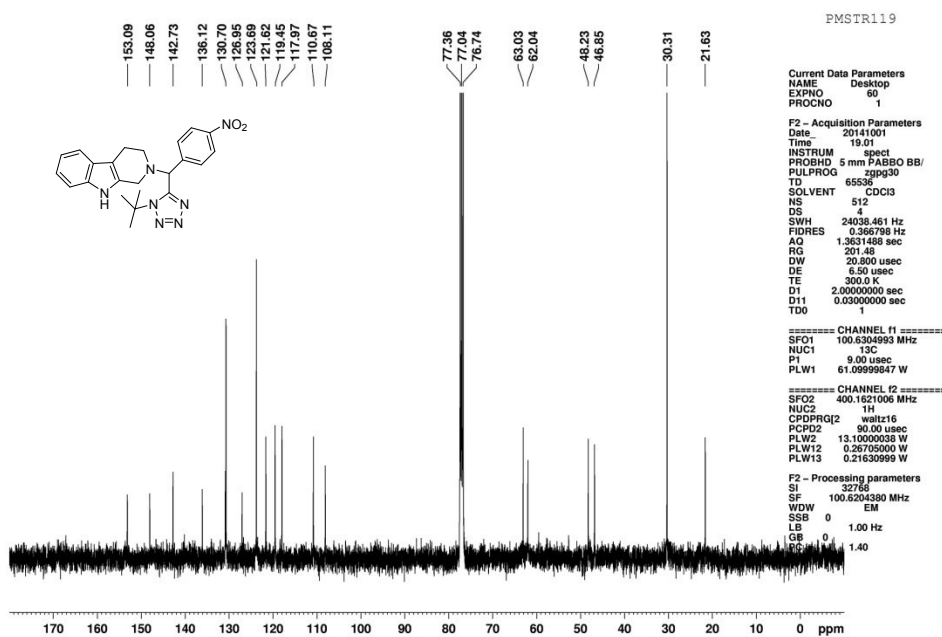

### <sup>1</sup>H and <sup>13</sup>C NMR spectra of 14g

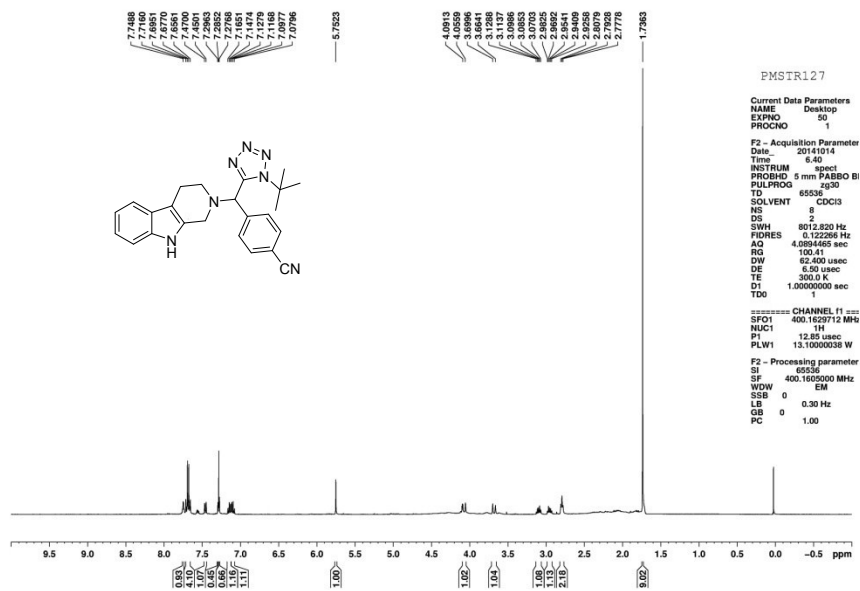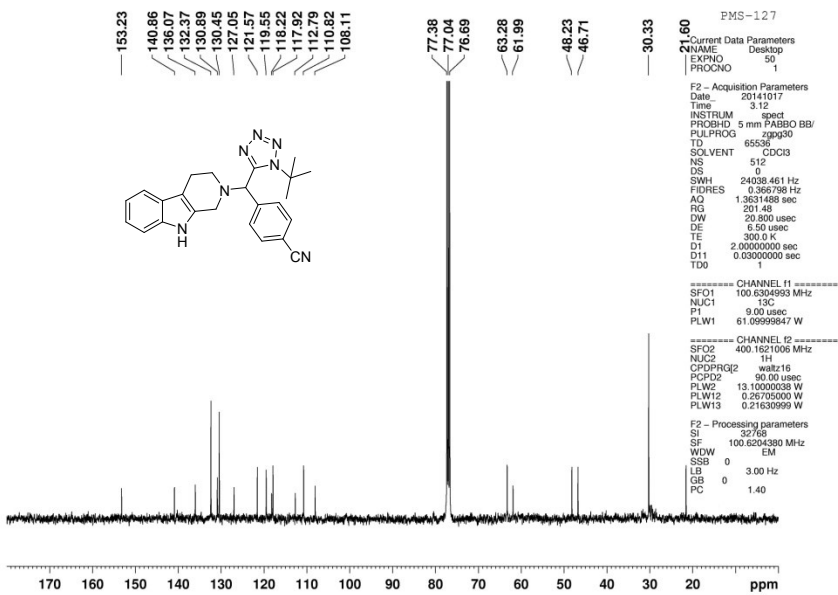

# <sup>1</sup>H and <sup>13</sup>C NMR spectra of 14h

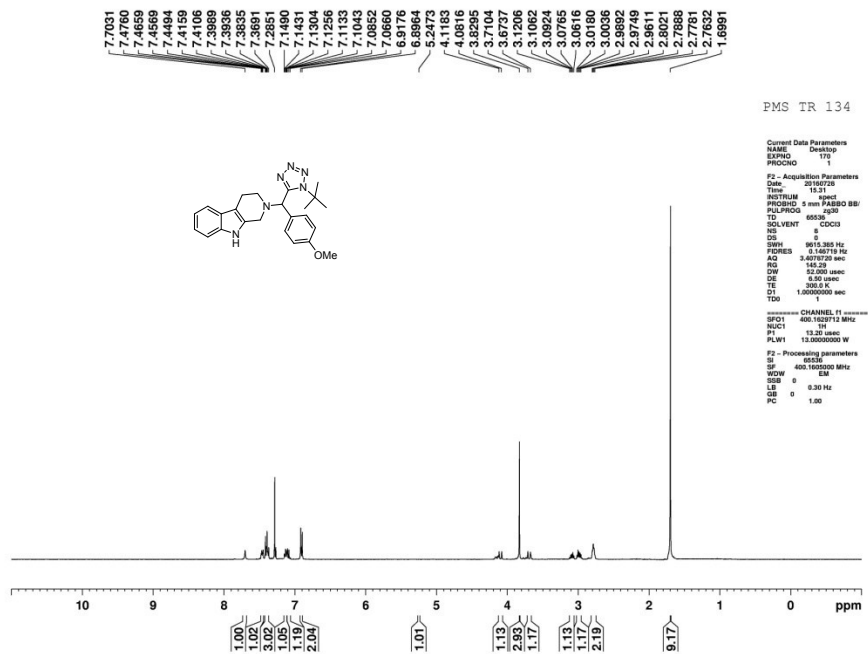

PMS TR 134

Current Data Parameters  
NAME: 14h  
EXPNO: 179  
PROCNO: 1  
F2 - Acquisition Parameters  
Date\_: 20160728  
Time: 15.31  
INSTRUM: spect  
PROBHD: 5 mm PABBO BB  
PULPROG: zgpg30  
TD: 65536  
SOLVENT: CDCl3  
DS: 8  
SWH: 9815.862 Hz  
FIDRES: 0.146719 Hz  
AQ: 3.607022 sec  
RG: 142.25  
WDW: 6.00 usec  
SSB: 0  
TE: 300.2 K  
D1: 1.0000000 sec  
TDO: 1  
===== CHANNEL f1 =====  
NUC1: 13C  
P1: 13.30 usec  
PLW1: 13.0000000 W  
F2 - Processing parameters  
SI: 65536  
SF: 100.6261000 MHz  
WDW: EM  
SSB: 0  
LB: 3.30 Hz  
GB: 0  
PC: 1.00

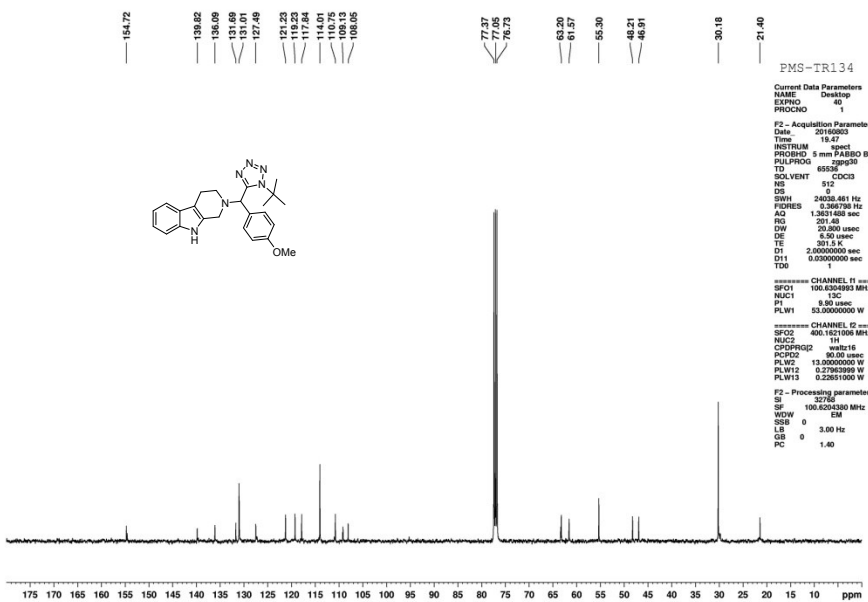

PMS-TR134

Current Data Parameters  
NAME: 14h  
EXPNO: 40  
PROCNO: 1  
F2 - Acquisition Parameters  
Date\_: 20160803  
Time: 15.47  
INSTRUM: spect  
PROBHD: 5 mm PABBO BB  
PULPROG: zgpg30  
TD: 65536  
SOLVENT: CDCl3  
DS: 8  
SWH: 24038.461 Hz  
FIDRES: 0.206790 Hz  
AQ: 1.3821468 sec  
RG: 281.48  
WDW: 6.00 usec  
SSB: 0  
TE: 301.5 K  
D1: 2.0000000 sec  
D11: 0.0300000 sec  
TDO: 1  
===== CHANNEL f1 =====  
NUC1: 13C  
P1: 8.00 usec  
PLW1: 53.0000000 W  
===== CHANNEL f2 =====  
SF2: 100.6261000 MHz  
NUC2: 1H  
PCPD2: 1H  
CPDPRG2: waltz16  
PCPD2: 80.00 usec  
PLW2: 13.0000000 W  
PLW12: 0.27983888 W  
PLW13: 0.23851500 W  
F2 - Processing parameters  
SI: 65536  
SF: 100.6261000 MHz  
WDW: EM  
SSB: 0  
LB: 3.30 Hz  
GB: 0  
PC: 1.00

### <sup>1</sup>H and <sup>13</sup>C NMR spectra of 14i

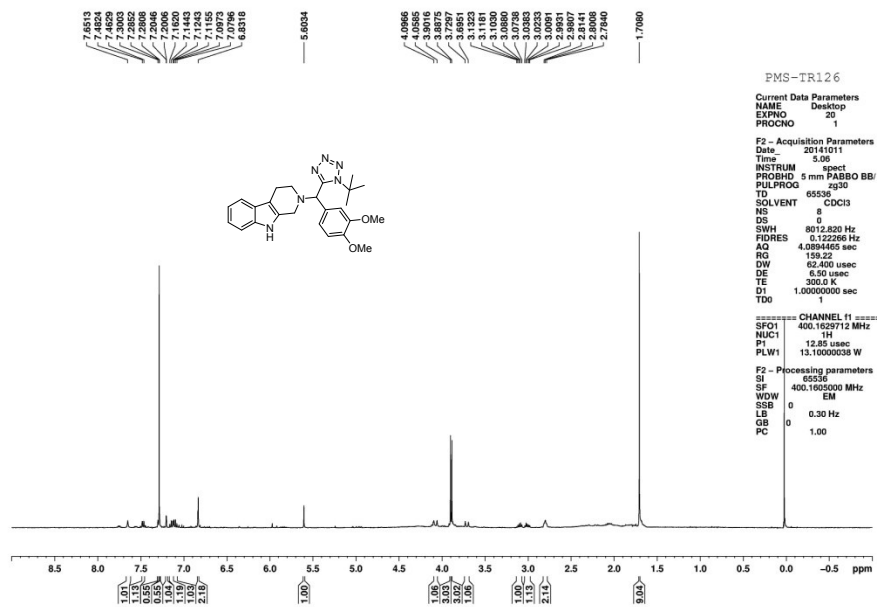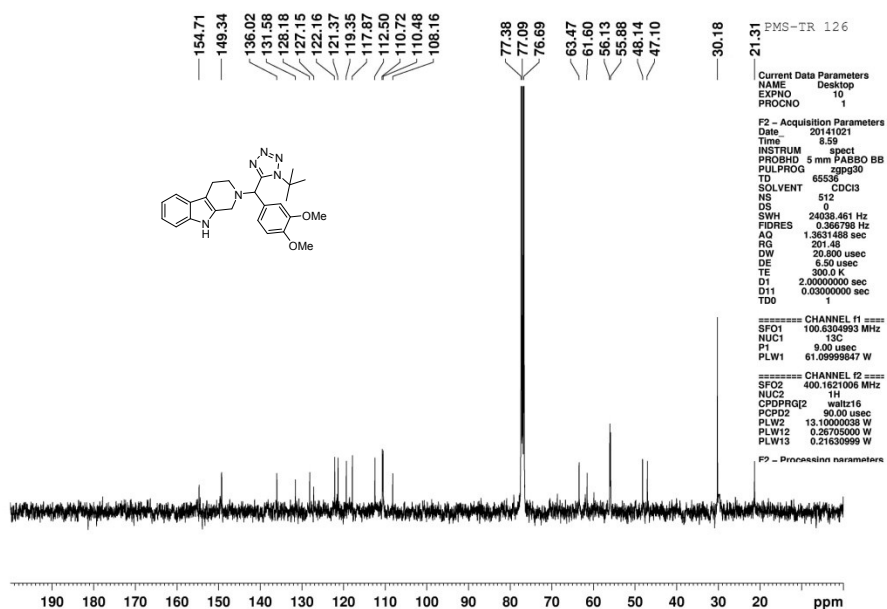

# <sup>1</sup>H and <sup>13</sup>C NMR spectra of 14j

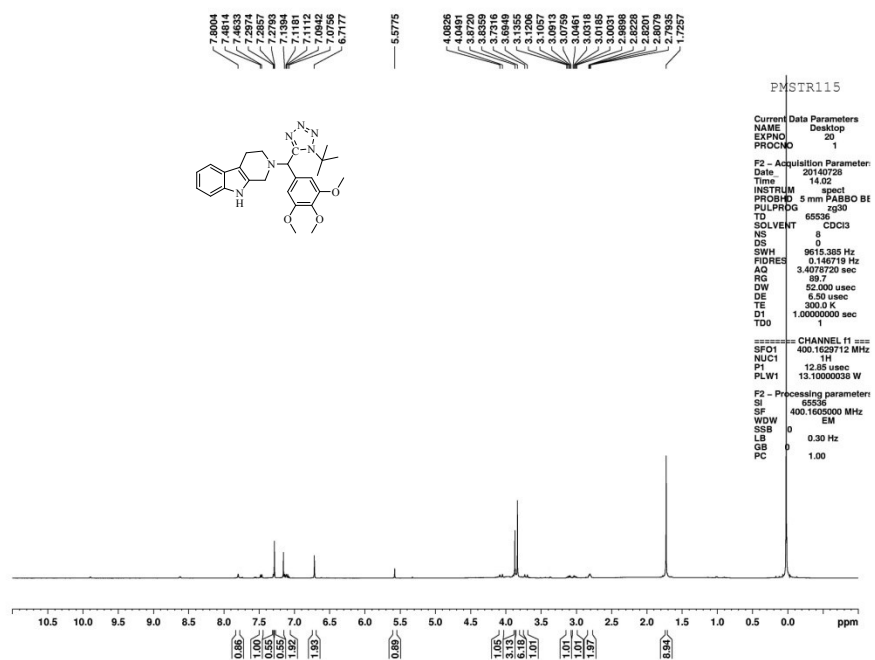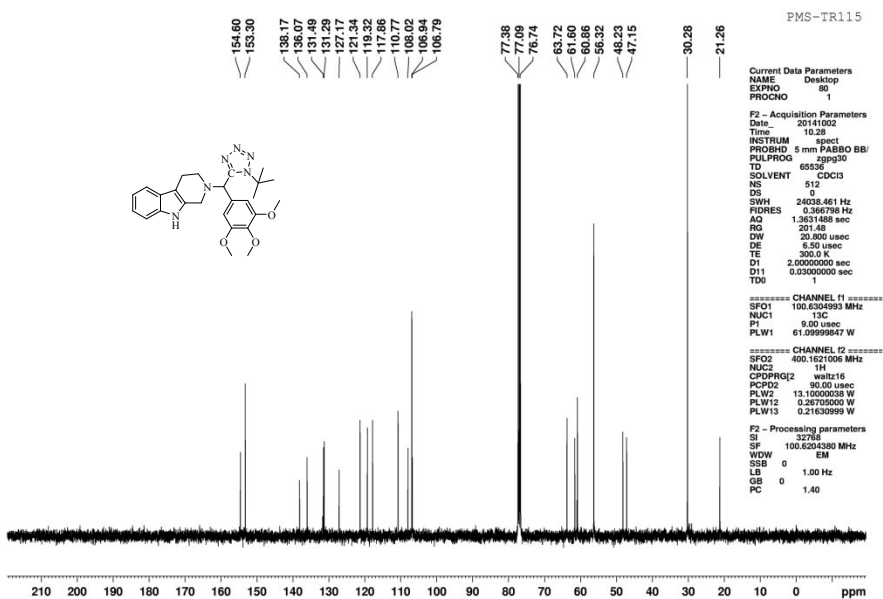

# <sup>1</sup>H and <sup>13</sup>C NMR spectra of 14k

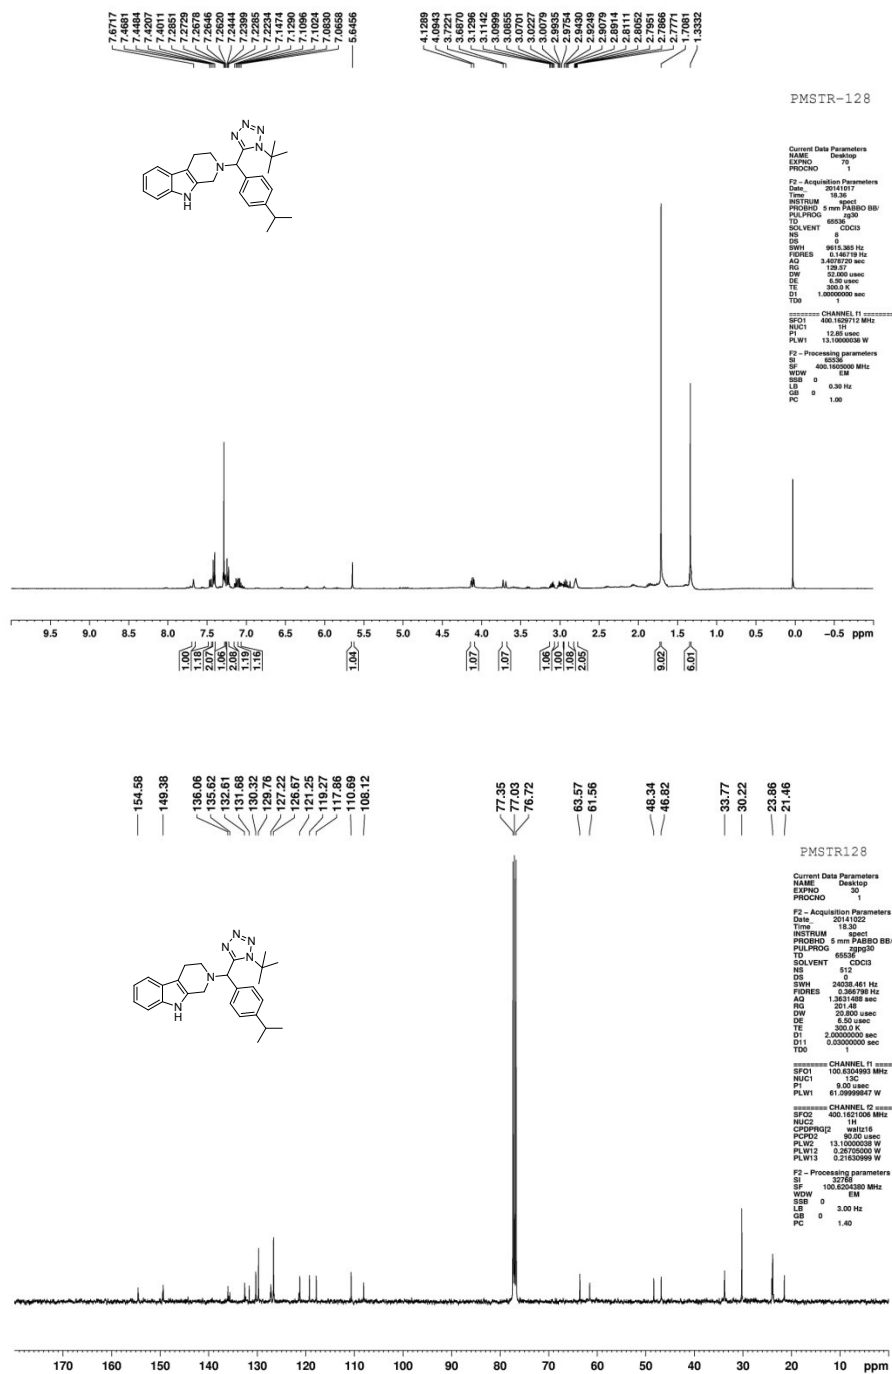

### <sup>1</sup>H and <sup>13</sup>C NMR spectra of 14l

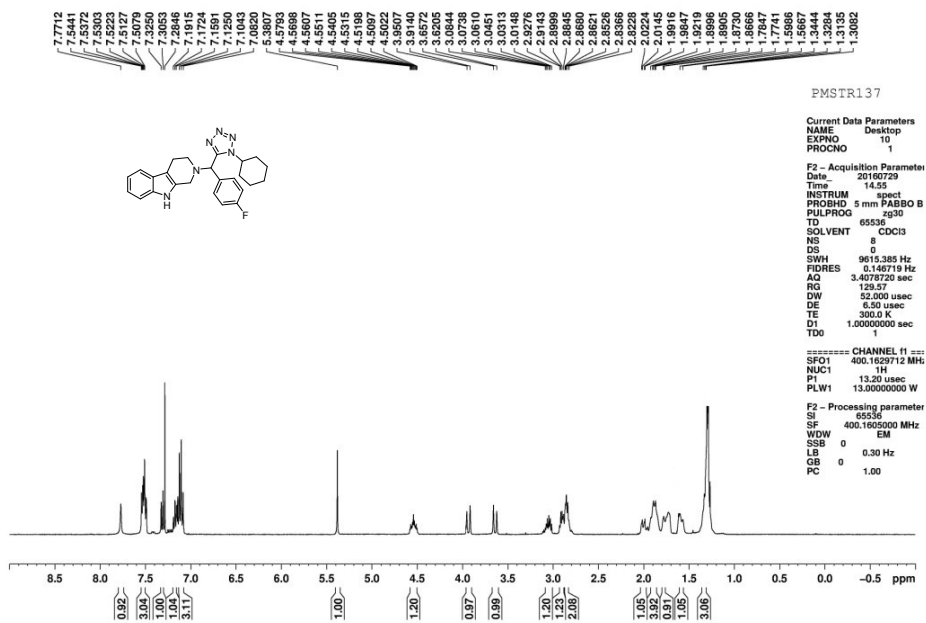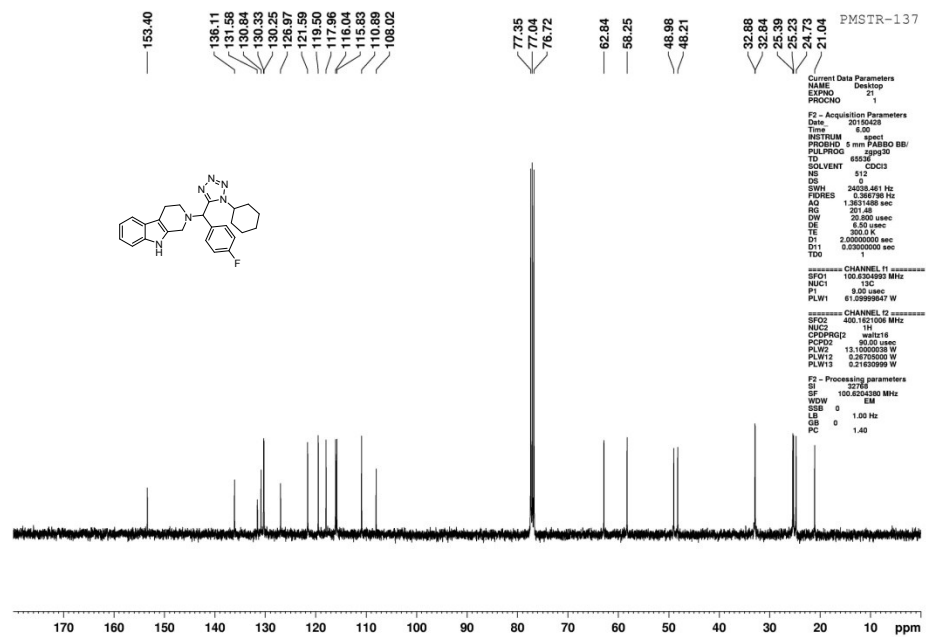

# <sup>1</sup>H and <sup>13</sup>C NMR spectra of 14m

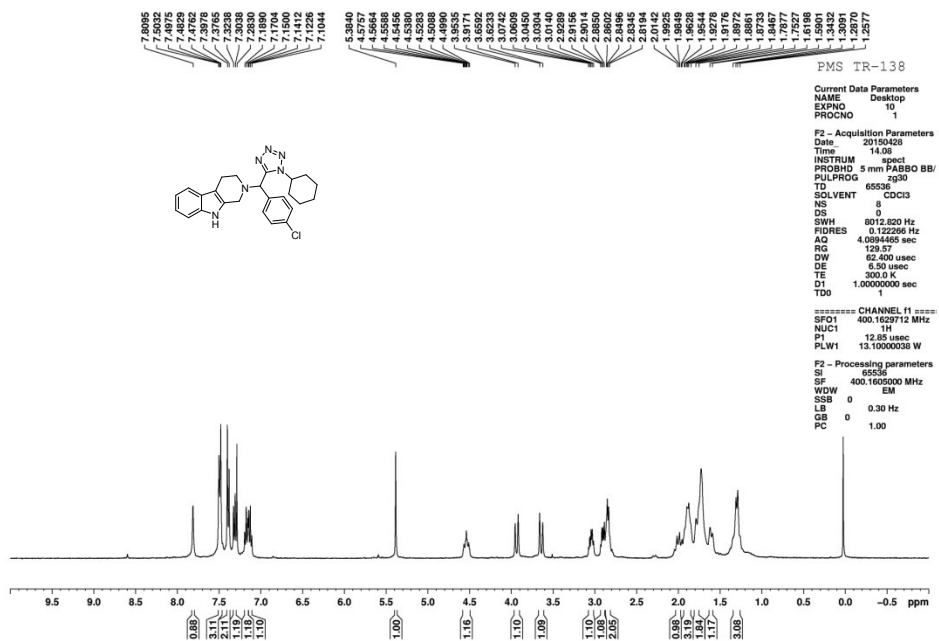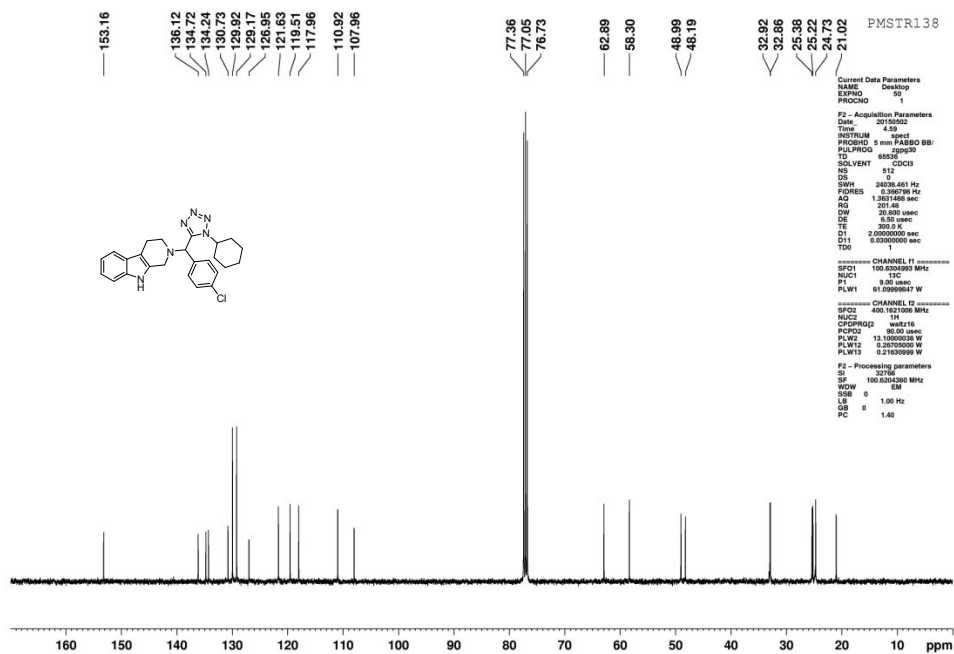

# <sup>1</sup>H and <sup>13</sup>C NMR spectra of 14n

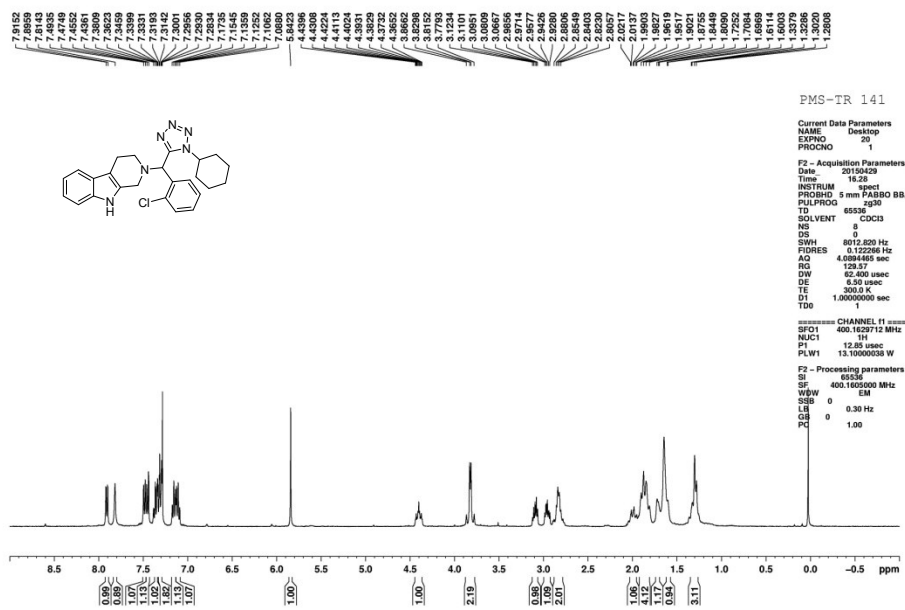

PMS-TR 141

Current Data Parameters  
NAME: Desktop  
EXPNO: 1  
PROCNO: 1

F2 - Acquisition Parameters  
Date\_: 20150429  
Time: 16.28  
INSTRUM: spect  
PROBHD: 5 mm PABBO BB/  
PULPROG: zg30  
TD: 65536  
SOLVENT: CDCl3  
NS: 8  
DS: 0  
SWH: 8012.820 Hz  
FIDRES: 0.122266 Hz  
AQ: 1.0381460 sec  
RG: 129.37  
DW: 62.400 usec  
DE: 6.50 usec  
TE: 300.2 K  
D1: 1.0000000 sec  
TDO: 1

===== CHANNEL f1 =====  
NUC1: 1H  
P1: 12.00 usec  
PLW1: 13.10000038 W

F2 - Processing parameters  
SI: 65536  
SF: 400.1405000 MHz  
WDW: EM  
SSB: 0  
LB: 0.30 Hz  
GB: 0  
PC: 1.00

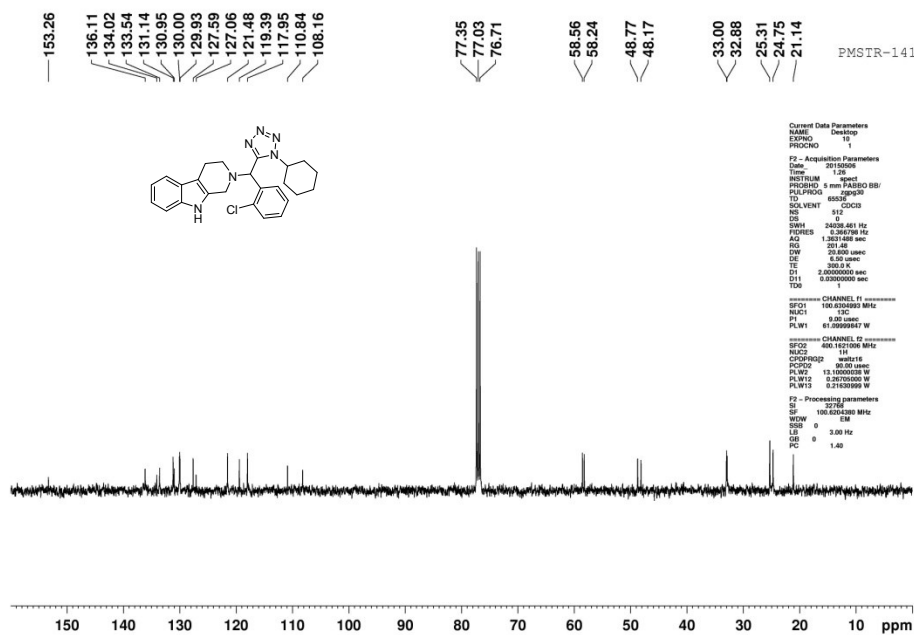

PMS-TR-141

Current Data Parameters  
NAME: Desktop  
EXPNO: 1  
PROCNO: 1

F2 - Acquisition Parameters  
Date\_: 20150429  
Time: 1.28  
INSTRUM: spect  
PROBHD: 5 mm PABBO BB/  
PULPROG: zgpg30  
TD: 65536  
SOLVENT: CDCl3  
NS: 812  
DS: 4  
SWH: 400.461 Hz  
FIDRES: 0.266798 Hz  
AQ: 1.307408 sec  
RG: 251.48  
DW: 6.50 usec  
DE: 6.50 usec  
TE: 300.2 K  
D1: 0.0000000 sec  
D11: 0.0000000 sec  
TDO: 1

===== CHANNEL f1 =====  
NUC1: 13C  
P1: 0.00 usec  
PLW1: 0.10000000 W

===== CHANNEL f2 =====  
NUC2: 1H  
P2: 12.00 usec  
PLW2: 13.10000038 W  
PLW3: 0.21000000 W

F2 - Processing parameters  
SI: 2778  
SF: 100.6261200 MHz  
WDW: EM  
SSB: 0  
LB: 2.00 Hz  
GB: 0  
PC: 1.00

# <sup>1</sup>H and <sup>13</sup>C NMR spectra of 14o

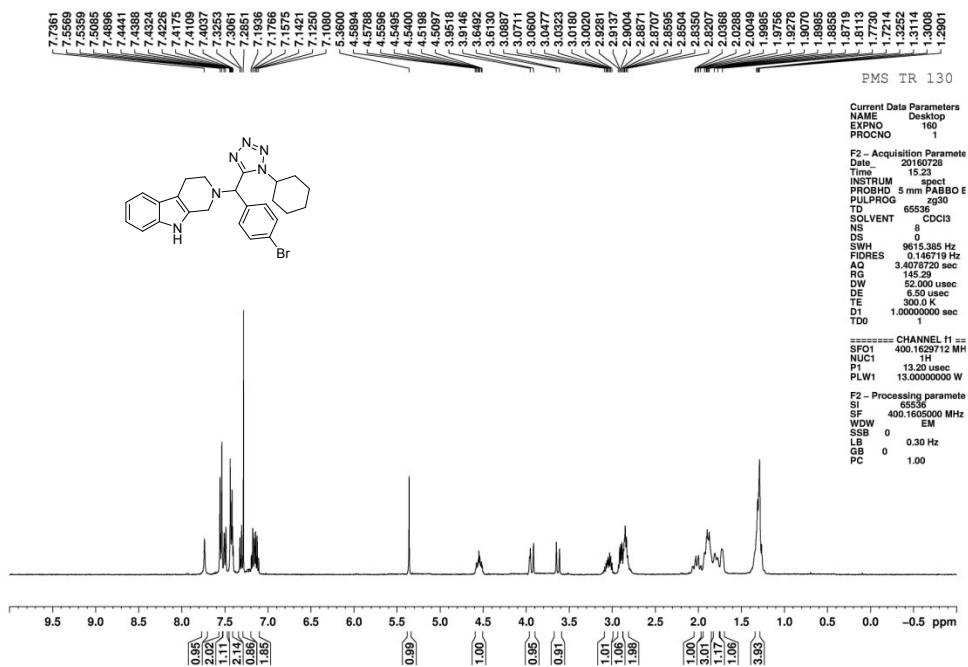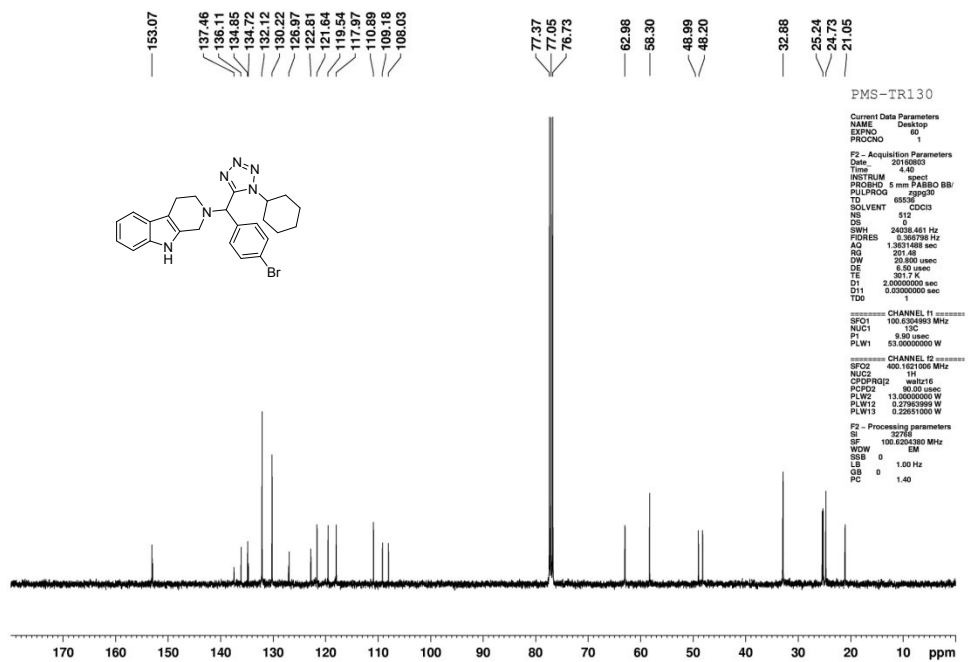

### <sup>1</sup>H and <sup>13</sup>C NMR spectra of 14p

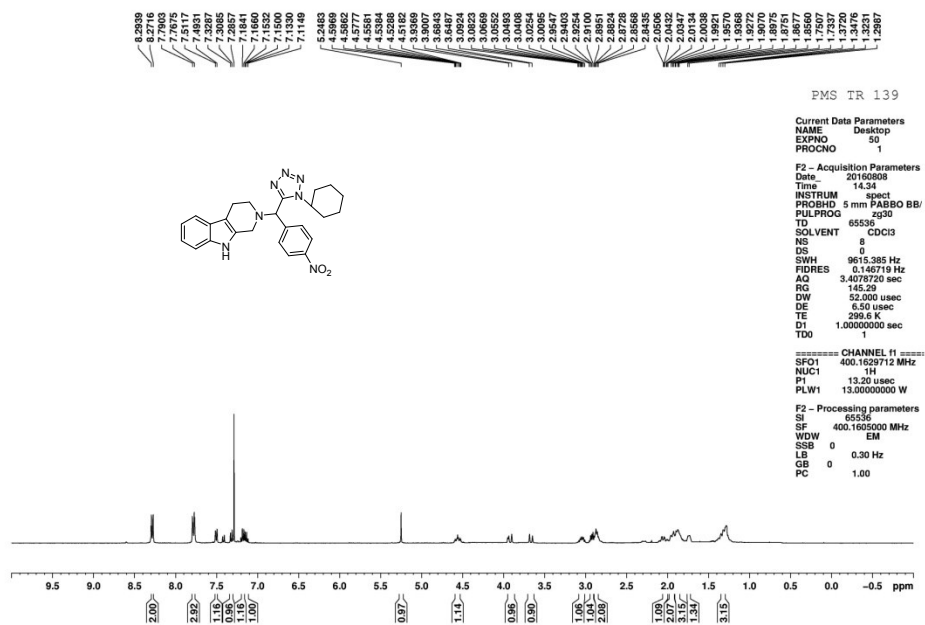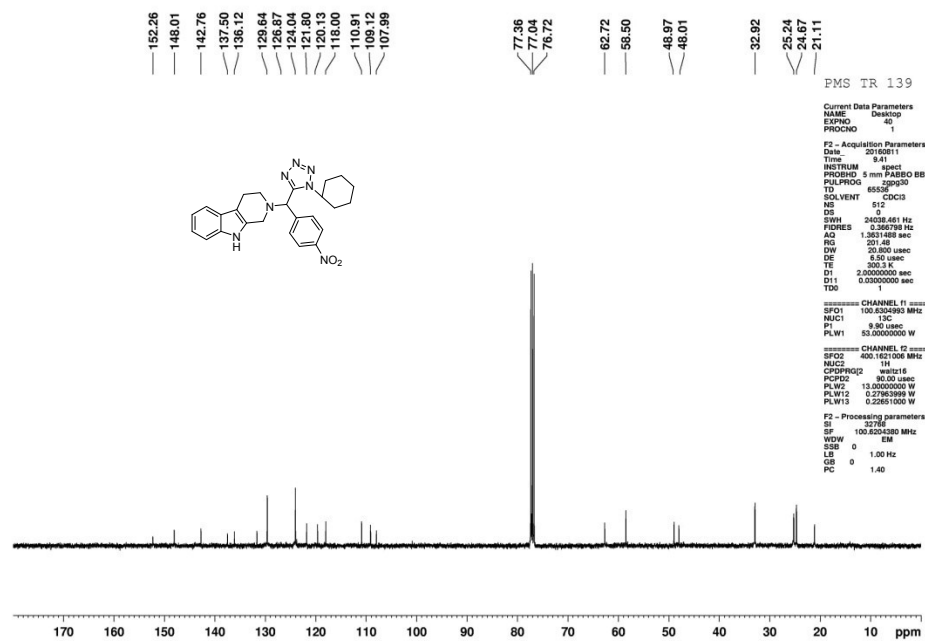

# <sup>1</sup>H and <sup>13</sup>C NMR spectra of 14q

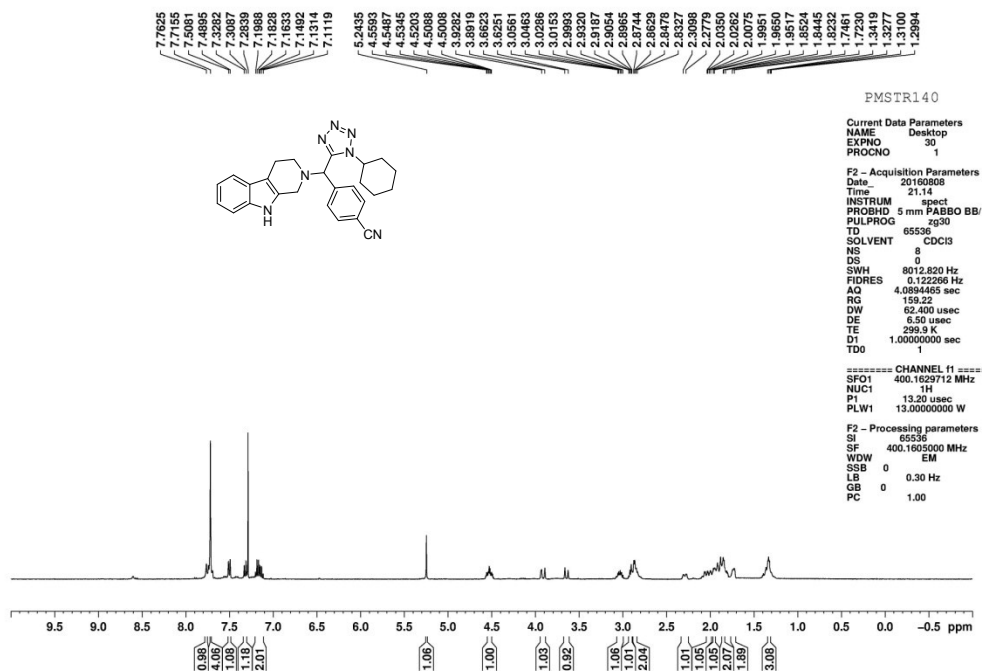

PMSTR140

Current Data Parameters  
NAME Desktop  
EXPNO 30  
PROCNO 1

F2 - Acquisition Parameters  
Date\_ 20160808  
Time 21:14  
INSTRUM spect  
PROBHD 5 mm PABBO BB/  
PULPROG zgpg30  
TD 65536  
SOLVENT CDCl3  
NS 8  
DS 0  
SWH 8012.820 Hz  
FIDRES 0.122266 Hz  
AQ 4.0894465 sec  
RG 159.22  
DW 62.400 usec  
DE 6.50 usec  
TE 299.9 K  
D1 1.00000000 sec  
TD0 1

===== CHANNEL f1 =====  
SFO1 400.1629712 MHz  
NUC1 1H  
P1 13.20 usec  
PLW1 13.00000000 W

F2 - Processing parameters  
SI 65536  
SF 400.1605000 MHz  
WDW EM  
SSB 0  
LB 0.30 Hz  
GB 0  
PC 1.00

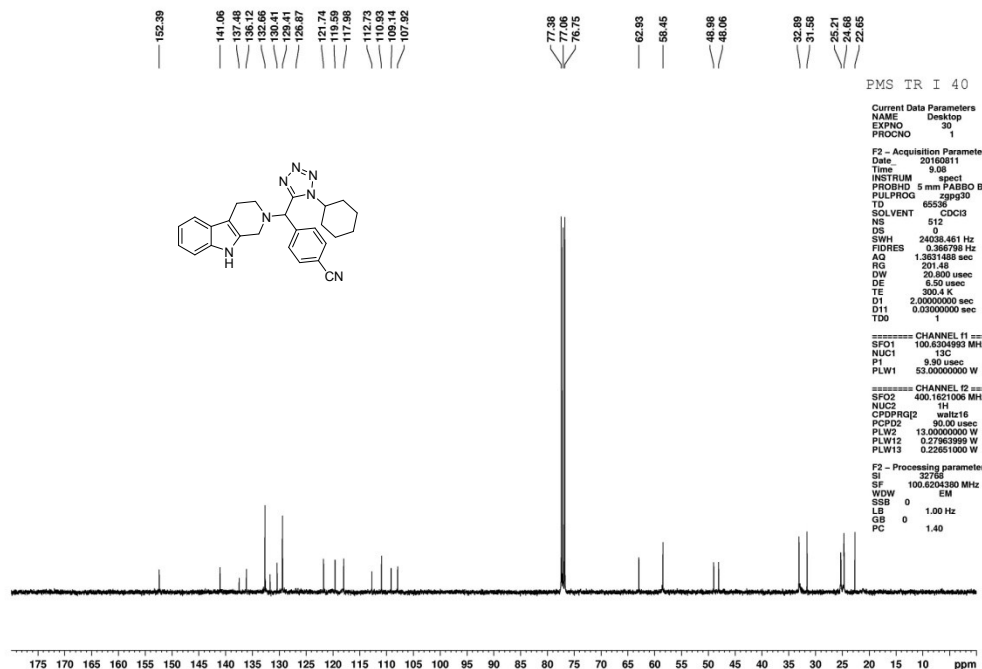

PMS TR I 40

Current Data Parameters  
NAME Desktop  
EXPNO 30  
PROCNO 1

F2 - Acquisition Parameter  
Date\_ 20160811  
Time 9:08  
INSTRUM spect  
PROBHD 5 mm PABBO B/  
PULPROG zgpg30  
TD 65536  
SOLVENT CDCl3  
NS 512  
DS 0  
SWH 24038.461 Hz  
FIDRES 0.366798 Hz  
AQ 1.3631488 sec  
RG 291.48  
DW 20.500 usec  
DE 6.50 usec  
TE 300.4 K  
D1 2.00000000 sec  
D11 0.03000000 sec  
TD0 1

===== CHANNEL f1 =====  
SFO1 100.6260992 MHz  
NUC1 13C  
P1 9.50 usec  
PLW1 53.00000000 W

===== CHANNEL f2 =====  
SFO2 400.1621006 MHz  
NUC2 1H  
CPDPRG2 waltz16  
PCPD2 90.50 usec  
PLW2 13.00000000 W  
PLW12 0.27763399 W  
PLW13 0.22651000 W

F2 - Processing parameter  
SI 32768  
SF 100.6204380 MHz  
WDW EM  
SSB 0  
LB 1.00 Hz  
GB 0  
PC 1.40

# <sup>1</sup>H and <sup>13</sup>C NMR spectra of 14r

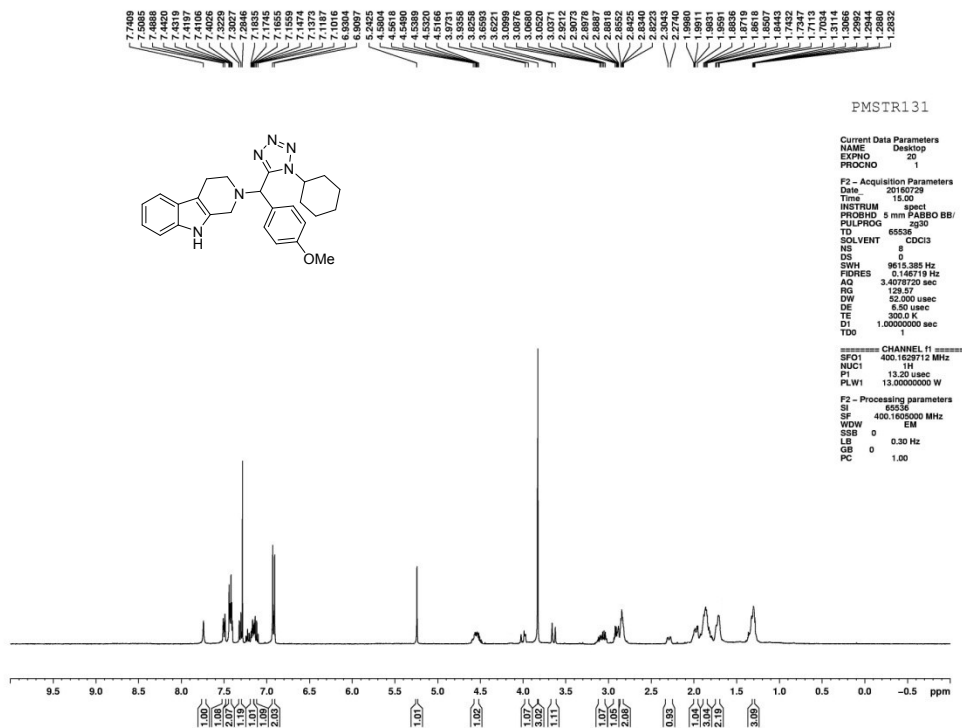

# <sup>1</sup>H and <sup>13</sup>C NMR spectra of 14s

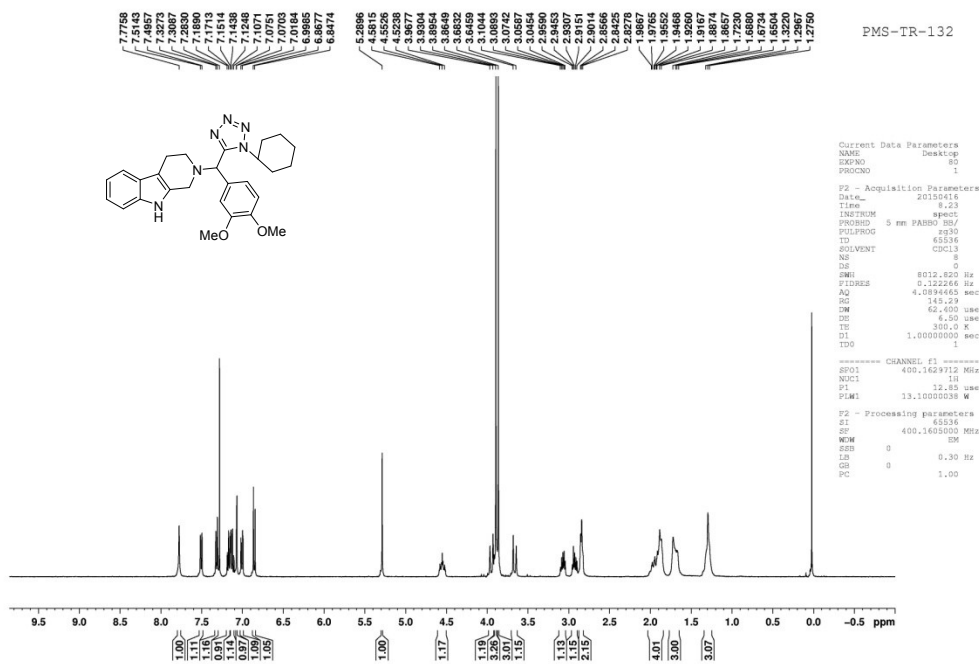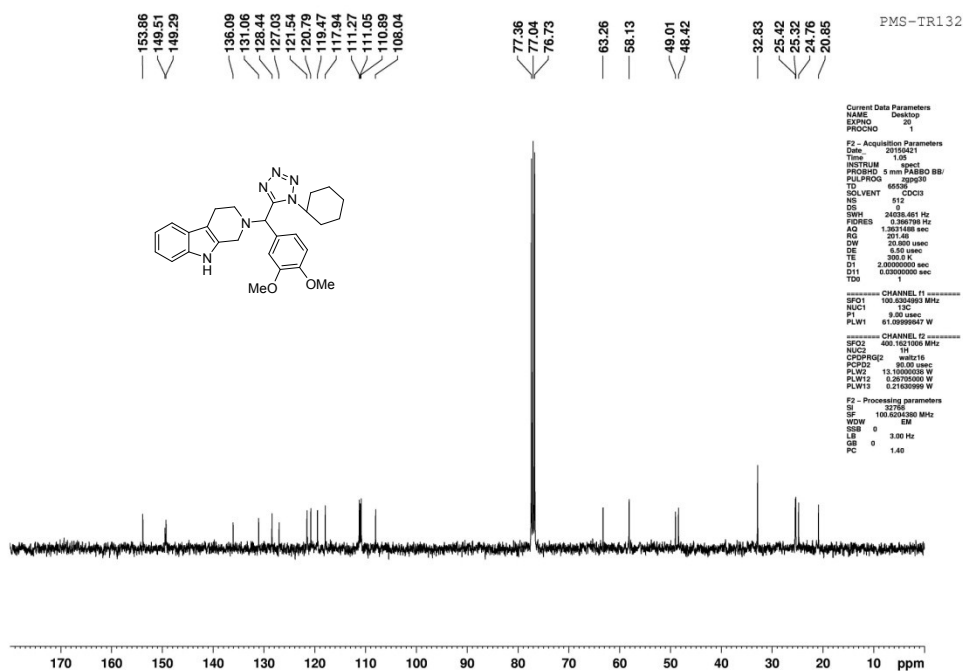

# <sup>1</sup>H and <sup>13</sup>C NMR spectra of 14t

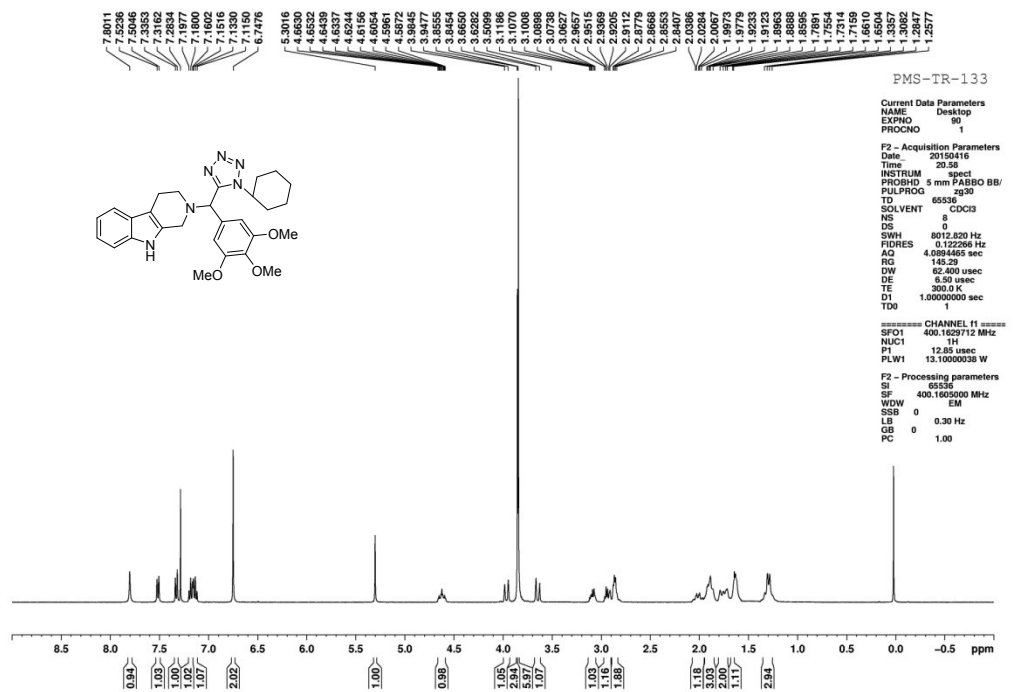

PMS-TR-133

Current Data Parameters  
NAME Desktop  
EXPNO 80  
PROCNO 1

F2 - Acquisition Parameters  
Date\_ 20150416  
Time 20.58  
INSTRUM spect  
PROBHD 5 mm PABBO BB/  
PULPROG zg30  
TD 65536  
SOLVENT CDCl3  
NS 8  
DS 0  
SWH 8012.820 Hz  
FIDRES 0.122286 Hz  
AQ 4.0894465 sec  
RG 145.20  
DW 62.400 usec  
DE 6.50 usec  
TE 300.0 K  
D1 1.00000000 sec  
D11 1  
D12 1

===== CHANNEL f1 =====  
SFO1 400.1529712 MHz  
NUC1 1H  
P1 12.85 usec  
PLW1 13.10000038 W

F2 - Processing parameters  
SI 65536  
SF 400.1505000 MHz  
WDW EM  
SSB 0  
CB 0.30 Hz  
PC 1.00

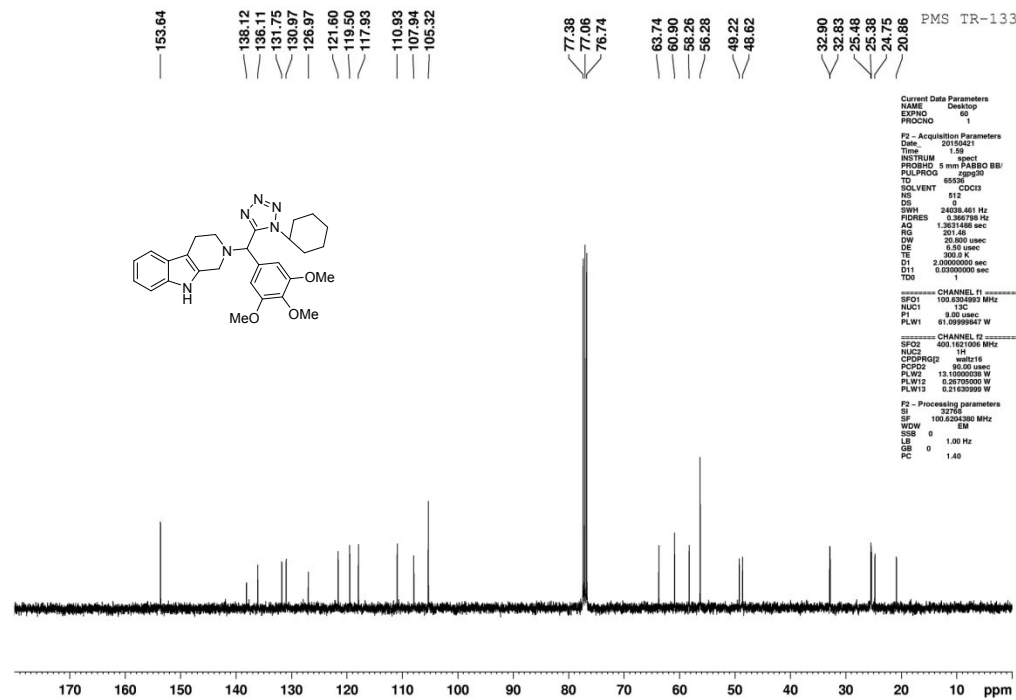

PMS TR-133

Current Data Parameters  
NAME Desktop  
EXPNO 60  
PROCNO 1

F2 - Acquisition Parameters  
Date\_ 20150421  
Time 1.58  
INSTRUM spect  
PROBHD 5 mm PABBO BB/  
PULPROG zgpg30  
TD 65536  
SOLVENT CDCl3  
NS 812  
DS 0  
SWH 24028.451 Hz  
FIDRES 3.366706 Hz  
AQ 1.351488 sec  
RG 251.48  
DW 20.000 usec  
DE 6.50 usec  
TE 300.0 K  
D1 2.00000000 sec  
D11 1  
D12 1

===== CHANNEL f1 =====  
SFO1 100.626992 MHz  
NUC1 13C  
P1 9.50 usec  
PLW1 61.09999847 W

===== CHANNEL f2 =====  
SFO2 400.1529712 MHz  
NUC2 1H  
PCPD2 80.00 usec  
PLW2 13.10000038 W  
PLW12 0.20705000 W  
PLW13 0.21600000 W

F2 - Processing parameters  
SI 32768  
SF 100.6269920 MHz  
WDW EM  
SSB 0  
CB 1.00 Hz  
PC 1.40

# <sup>1</sup>H and <sup>13</sup>C NMR spectra of 14u

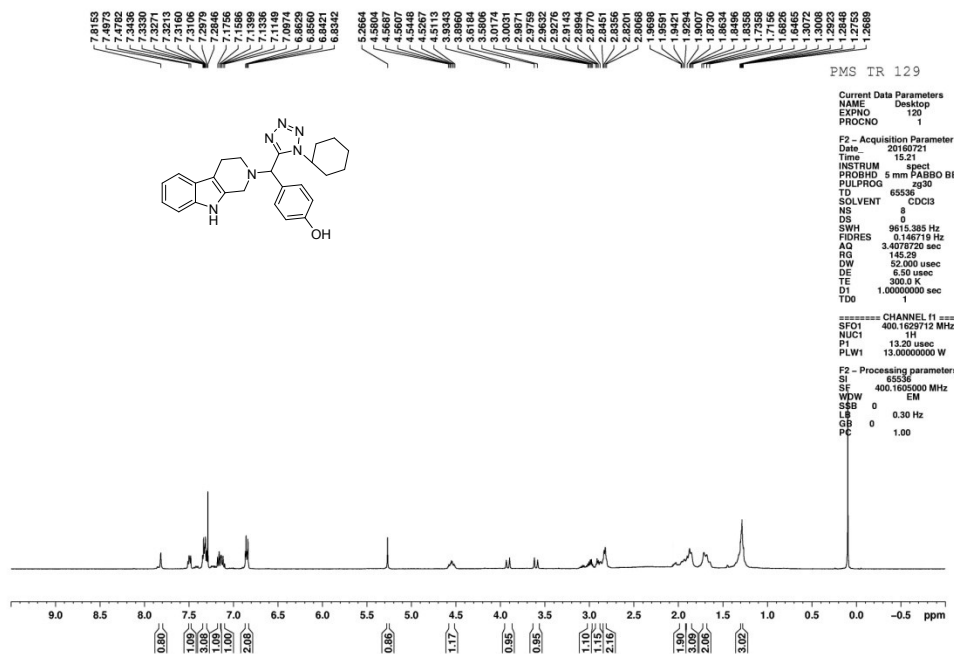

PMS TR 129

Current Data Parameters  
NAME Desktop  
EXPNO 120  
PROCNO 1

F2 - Acquisition Parameter  
Date\_ 20160721  
Time 15.21  
INSTRUM spect  
PROBHD 5 mm F4BBO B1  
PULPROG zg30  
TD 65536  
SOLVENT CDCl3  
NS 0  
DS 0  
SWH 9615.385 Hz  
FIDRES 0.146719 Hz  
AQ 3.4076720 sec  
RG 145.25  
DW 52.000 usec  
DE 6.50 usec  
TE 300.0 K  
D1 1.0000000 sec  
TD0 1

===== CHANNEL f1 =====  
SFO1 400.1629712 MHz  
NUC1 1H  
P1 13.20 usec  
PLW1 13.00000000 W

F2 - Processing parameter:  
SI 65536  
SF 400.1605000 MHz  
WDW EM  
SSB 0  
LB 0.30 Hz  
GB 0  
PC 1.00

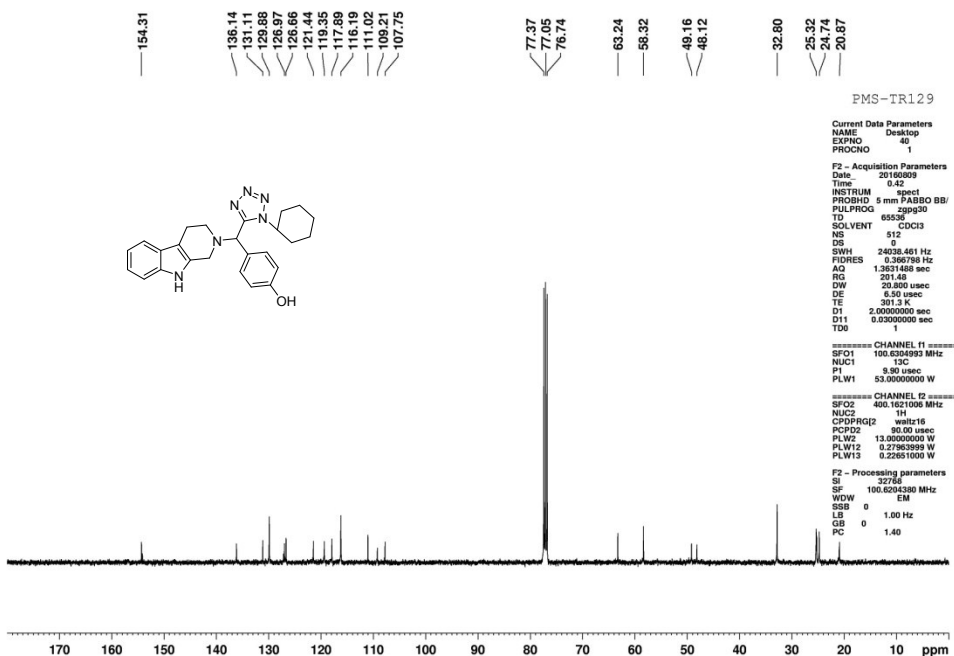

PMS-TR129

Current Data Parameters  
NAME Desktop  
EXPNO 40  
PROCNO 1

F2 - Acquisition Parameters  
Date\_ 20160809  
Time 0.42  
INSTRUM spect  
PROBHD 5 mm F4BBO BB  
PULPROG zgpg30  
TD 65536  
SOLVENT CDCl3  
NS 512  
DS 0  
SWH 24028.461 Hz  
FIDRES 0.366788 Hz  
AQ 1.3631488 sec  
RG 201.49  
DW 20.600 usec  
DE 6.50 usec  
TE 301.3 K  
D1 2.0000000 sec  
D11 0.0300000 sec  
TD0 1

===== CHANNEL f1 =====  
SFO1 100.6264692 MHz  
NUC1 13C  
P1 5.90 usec  
PLW1 53.00000000 W

===== CHANNEL f2 =====  
SFO2 400.1621006 MHz  
NUC2 1H  
CPCPRG2 waltz16  
PCPD2 90.00 usec  
PLW2 13.00000000 W  
PLW12 0.27963999 W  
PLW13 0.22651000 W

F2 - Processing parameters  
SI 32768  
SF 100.6204330 MHz  
WDW EM  
SSB 0  
LB 1.00 Hz  
GB 0  
PC 1.40
